# Supplementary material
Source: publisher figshare collection journal article supplement (https://frontiersin.figshare.com/ndownloader/files/24356102)
Supplement: Supplementary file [file 24356102]

**Supplementary Table S2:** Details on the sequencing depth and coverage for each individual of each trio.

| <b>Trio</b>    | <b>Individual</b> | <b>Coverage at 2X</b> | <b>Coverage at 10x</b> | <b>Coverage at 20x</b> | <b>Coverage at 30x</b> | <b>Coverage at 50x</b> | <b>Coverage at 100x</b> |
|----------------|-------------------|-----------------------|------------------------|------------------------|------------------------|------------------------|-------------------------|
| <b>1</b>       | Pr                | 94.76%                | 86.96%                 | 71.84%                 | 54.26%                 | 26.28%                 | 3.14%                   |
|                | F                 | 95.44%                | 87.48%                 | 71.22%                 | 51.55%                 | 22.34%                 | 1.85%                   |
|                | M                 | 95.82%                | 90.24%                 | 78.22%                 | 61.67%                 | 31.11%                 | 4.14%                   |
| <b>2</b>       | Pr                | 95.73%                | 89.24%                 | 74.96%                 | 55.82%                 | 24.81%                 | 2.27%                   |
|                | F                 | 95.98%                | 90.53%                 | 77.96%                 | 60.66%                 | 29.94%                 | 3.63%                   |
|                | M                 | 95.59%                | 89.69%                 | 77.57%                 | 60.45%                 | 28.78%                 | 3.24%                   |
| <b>3</b>       | Pr                | 95.53%                | 88.76%                 | 74.41%                 | 55.51%                 | 25.11%                 | 2.26%                   |
|                | F                 | 95.75%                | 89.21%                 | 74.97%                 | 56.17%                 | 25.44%                 | 2.41%                   |
|                | M                 | 95.61%                | 88.64%                 | 73.61%                 | 53.68%                 | 23.02%                 | 1.65%                   |
| <b>4</b>       | Pr                | 95.94%                | 90.68%                 | 79.59%                 | 64.32%                 | 34.00 %                | 5.49%                   |
|                | F                 | 95.60%                | 87.81%                 | 71.29%                 | 50.92%                 | 21.30%                 | 1.46%                   |
|                | M                 | 95.30%                | 86.42%                 | 65.17%                 | 40.55%                 | 13.53%                 | 0.41%                   |
| <b>Average</b> |                   | 95.59%                | 88.81%                 | 74.23%                 | 55.46%                 | 25.47%                 | 2.66%                   |

Notes:

Abbreviations: F: Father, M: Mother, Pr: Proband
